# Supplementary material
Source: bioRxiv or medRxiv preprint supplement (https://www.biorxiv.org/highwire/filestream/36796/field_highwire_adjunct_files/0/124362-1.pdf)
Supplement: Supplementary file [file 124362-1.pdf]

## **SUPPLEMENTARY MATERIAL**

### **Supplementary methods 1**

Genetic data in the ALSPAC cohort Genotypic information was available on 9912 of the study participants using the Illumina HumanHap550 quad genome-wide SNP genotyping platform (8). Following quality control checks on the genotypic data, participants were removed from further analysis if they had incorrect sex assignments; minimal or excessive heterozygosity; disproportionate levels of individual missingness; evidence of cryptic relatedness (i.e. kinship among participants that is not known to the investigator) or being of non-European ancestry (as detected by a multidimensional scaling analysis seeded with HapMap 2 participants) as reported previously (8, 9). SNPs that had a minor allele frequency (MAF) of <1% and call rate of <95% were removed, along with SNPs that did not pass an exact test of Hardy-Weinberg equilibrium ( $P > 5 \times 10^{-7}$ ). The resulting dataset contained 8237 individuals.

We estimated haplotypes using ShapeIT (v2.r644), which utilizes relatedness during phasing. We obtained a phased version of the 1000 genomes reference panel (Phase 1, Version 3) from the Impute2 reference data repository (phased using ShapeIT v2.r644 (36), haplotype release date Dec 2013). Imputation of the target data was performed using Impute V2.2.2 (37, 38) against the reference panel (all polymorphic SNPs excluding singletons), using all 2186 reference haplotypes (including non-Europeans).

### **Supplementary methods 2: Additional sample descriptions**

#### ***1000 Genomes European (EUR)***

Data were generally from the 1000 Genomes project (<http://www.1000genomes.org/>) using the European subpopulations (Utah residents with Northern and Western European Ancestry (CEU), British in England and Scotland (GBR), Toscani in Italia (TSI) and Finnish in Finland (FIN)) with a sample size of 503 unrelated individuals (18). SNPs in the GWAS catalog were selected from this dataset (n=14,421) and then the data were pruned for LD using the `-indep-pairwise` function in PLINKv1.9 (14, 39) and the same parameters that were used for the ALSPAC sample (see main

manuscript). Areas of known long range LD were removed (15). This resulted in 9902 LD independent GWAS catalogue SNPs.

### ***Wellcome Trust Case Control Consortium (WTCCC)***

Data were from the WTCCC using only control individuals that were genotyped on 500K Affymetrix chip (17) (Affymetrix, Inc., Santa Clara, CA, United States) (<http://www.wtccc.org.uk/>). Data were combined using all SNPs in common. Data underwent routine quality control, removing SNPs genotype completeness less than 95%, minor allele frequency less than 1% and Hardy-Weinberg equilibrium p-value less than  $1 \times 10^{-6}$ . Genotypes were imputed using the pre-phasing/imputation stepwise approach implemented in IMPUTE2/SHAPEIT (38, 40) and 1000Genomes (December 2013, release 1000 Genomes haplotypes Phase I integrated variant set) as the reference dataset. Data was convert to best guess genotypes using PLINKv1.9 (14) and subsequently filtered to have an imputation info score greater than 0.8 and minor allele frequency great than 1%. Only control individuals were used for the analysis. The resulting dataset contained 5,355,033 SNPs and 2938 individuals. SNPs in the GWAS catalog were selected from this dataset (n=10,134) and then the data was pruned for LD using the –indep-pairwise function in PLINKv1.9 (14) and the same parameters that were used for the ALSPAC sample (see main manuscript). Areas of known long range LD were removed (15). This resulted in 6943 LD independent GWAS catalogue SNPs.

**Supplementary Table 1.** Summary of included phenotypes.

| Source and Additional Information                                                                                                                                                                                                                                   | Phenotype                                           | Variable Type   | Total N | N cases (%) <sup>a</sup> | Mean (sd) <sup>b</sup> | N categories (N range) <sup>c</sup> |
|---------------------------------------------------------------------------------------------------------------------------------------------------------------------------------------------------------------------------------------------------------------------|-----------------------------------------------------|-----------------|---------|--------------------------|------------------------|-------------------------------------|
| <a href="http://www.bristol.ac.uk/alspac/researchers/resources-available/data-details/data-tables/documents/focusclinicsessions.pdf">http://www.bristol.ac.uk/alspac/researchers/resources-available/data-details/data-tables/documents/focusclinicsessions.pdf</a> | Child Age 7 Clinic                                  | Leg length (cm) | 6,082   | -                        | 57.89 (3.42)           | -                                   |
|                                                                                                                                                                                                                                                                     | Head circumference (cm)                             | Continuous      | 6,084   | -                        | 52.51 (1.45)           | -                                   |
|                                                                                                                                                                                                                                                                     | Arm circumference (cm)                              | Continuous      | 6,074   | -                        | 18.96 (2.11)           | -                                   |
|                                                                                                                                                                                                                                                                     | Waist circumference (cm)                            | Continuous      | 6,079   | -                        | 56.42 (5.17)           | -                                   |
|                                                                                                                                                                                                                                                                     | Hip circumference (cm)                              | Continuous      | 6,077   | -                        | 65.50 (5.30)           | -                                   |
|                                                                                                                                                                                                                                                                     | Forearm (cm)                                        | Continuous      | 6,059   | -                        | 18.33 (1.13)           | -                                   |
|                                                                                                                                                                                                                                                                     | BMI                                                 | Continuous      | 6,027   | -                        | 16.23 (2.04)           | -                                   |
|                                                                                                                                                                                                                                                                     | Scoliometer measure                                 | Ordinal         | 5,969   | -                        | 1.54 (1.15)            | -                                   |
|                                                                                                                                                                                                                                                                     | Any flexural dermatitis                             | Binary          | 6,065   | 468 (7.7)                | -                      | -                                   |
|                                                                                                                                                                                                                                                                     | Allergy: Reaction to DP                             | Binary          | 5,399   | 667 (12.4)               | -                      | -                                   |
|                                                                                                                                                                                                                                                                     | Allergy: Reaction to dog                            | Binary          | 1,895   | 89 (4.7)                 | -                      | -                                   |
|                                                                                                                                                                                                                                                                     | Air conduction right ear average 1,2,3 kHz          | Continuous      | 5,482   | -                        | 8.18 (7.07)            | -                                   |
|                                                                                                                                                                                                                                                                     | Air conduction left ear average 1,2,3 kHz           | Continuous      | 5,416   | -                        | 7.90 (7.28)            | -                                   |
|                                                                                                                                                                                                                                                                     | Bone conduction hearing threshold level (dBHL) 1kHz | Continuous      | 3,111   | -                        | 3.81 (5.38)            | -                                   |
|                                                                                                                                                                                                                                                                     | Right air bone gap 1kHz                             | Continuous      | 5,393   | -                        | 11.20 (8.37)           | -                                   |
|                                                                                                                                                                                                                                                                     | Hearing impairment                                  | Categorical     | 5,696   | -                        | -                      | 4 (133-5,248)                       |
|                                                                                                                                                                                                                                                                     | Sensorineural hearing loss                          | Categorical     | 5,407   | -                        | -                      | 9 (3-5,287)                         |
|                                                                                                                                                                                                                                                                     | High frequency hearing loss                         | Categorical     | 5,687   | -                        | -                      | 4 (20-5,687)                        |
|                                                                                                                                                                                                                                                                     | Bilateral tympanometry                              | Categorical     | 5,791   | -                        | -                      | 25 (4-4,203)                        |
|                                                                                                                                                                                                                                                                     | Handedness                                          | Binary          | 6,002   | 716 (11.9)               | -                      | -                                   |
|                                                                                                                                                                                                                                                                     | Reading score                                       | Continuous      | 5,986   | -                        | 28.45 (9.25)           | -                                   |
|                                                                                                                                                                                                                                                                     | Spelling score                                      | Continuous      | 5,890   | -                        | 7.88 (4.39)            | -                                   |
|                                                                                                                                                                                                                                                                     | Phoneme task score                                  | Continuous      | 6,014   | -                        | 20.22 (9.51)           | -                                   |
|                                                                                                                                                                                                                                                                     | Mean diastolic blood pressure                       | Continuous      | 6,013   | -                        | 56.32 (6.62)           | -                                   |
|                                                                                                                                                                                                                                                                     | Mean pulse                                          | Continuous      | 6,011   | -                        | 82.99 (10.80)          | -                                   |
|                                                                                                                                                                                                                                                                     | Hemoglobin value                                    | Continuous      | 4,761   | -                        | 124.48 (7.86)          | -                                   |
|                                                                                                                                                                                                                                                                     | Heel to Toe test                                    | Ordinal         | 5,414   | -                        | 8.70 (5.71)            | -                                   |
|                                                                                                                                                                                                                                                                     | Peg game test                                       | Categorical     | 5,436   | -                        | -                      | 6 (18-4,955)                        |
|                                                                                                                                                                                                                                                                     | String game test                                    | Continuous      | 4,950   | -                        | 23.16 (7.71)           | -                                   |
|                                                                                                                                                                                                                                                                     | Bean bag game test                                  | Ordinal         | 5,415   | -                        | 5.83 (2.08)            | -                                   |
|                                                                                                                                                                                                                                                                     | Observable vision abnormality                       | Binary          | 5,896   | 139 (2.4)                | -                      | -                                   |
|                                                                                                                                                                                                                                                                     | Summary of eye preference                           | Categorical     | 5,772   | -                        | -                      | 6 (11-3,343)                        |
|                                                                                                                                                                                                                                                                     | Manifest strabismus                                 | Categorical     | 5,922   | -                        | -                      | 5 (9-5,774)                         |
| Binocular function group                                                                                                                                                                                                                                            | Categorical                                         | 5,931           | -       | -                        | 6 (10-4,163)           |                                     |
| Combined pursuit eye movements                                                                                                                                                                                                                                      | Categorical                                         | 5,922           | -       | -                        | 4 (90-5,481)           |                                     |

|                                                                                                                                                                                                                     |                                                            |             |       |              |                |              |
|---------------------------------------------------------------------------------------------------------------------------------------------------------------------------------------------------------------------|------------------------------------------------------------|-------------|-------|--------------|----------------|--------------|
|                                                                                                                                                                                                                     | Mean convergence (vision)                                  | Continuous  | 5,883 | -            | 6.34 (1.21)    | -            |
|                                                                                                                                                                                                                     | Near vision (unaided)                                      | Categorical | 5,877 | -            | -              | 5 (8-5,807)  |
|                                                                                                                                                                                                                     | Mean accom (unaided)                                       | Continuous  | 5,849 | -            | 8.11 (1.79)    | -            |
|                                                                                                                                                                                                                     | 1 <sup>st</sup> degree relative has a lazy eye             | Binary      | 5,931 | 619 (10.4)   | -              | -            |
| Mother questionnaires during pregnancy                                                                                                                                                                              | Eat or drink health foods                                  | Binary      | 5,851 | 485 (8.3)    | -              | -            |
|                                                                                                                                                                                                                     | Highest education qualification                            | Binary      | 6,285 | 2,712 (43.2) | -              | -            |
|                                                                                                                                                                                                                     | Contraceptive pill use                                     | Binary      | 6,280 | 5,955 (94.8) | -              | -            |
| <a href="http://www.bristol.ac.uk/alspac/researchers/resources-available/data-details/questionnaires/#carer">http://www.bristol.ac.uk/alspac/researchers/resources-available/data-details/questionnaires/#carer</a> | History of diabetes                                        | Binary      | 6,271 | 63 (1.0)     | -              | -            |
|                                                                                                                                                                                                                     | History of hypertension                                    | Binary      | 6,183 | 884 (14.3)   | -              | -            |
|                                                                                                                                                                                                                     | Had bulimia                                                | Binary      | 6,293 | 146 (2.3)    | -              | -            |
|                                                                                                                                                                                                                     | Had asthma                                                 | Binary      | 6,293 | 715 (11.4)   | -              | -            |
|                                                                                                                                                                                                                     | Had eczema                                                 | Binary      | 6,293 | 1,464 (23.3) | -              | -            |
|                                                                                                                                                                                                                     | Had epilepsy                                               | Binary      | 6,293 | 70 (1.1)     | -              | -            |
|                                                                                                                                                                                                                     | Had kidney disease                                         | Binary      | 6,293 | 258 (4.1)    | -              | -            |
|                                                                                                                                                                                                                     | Had rheumatism                                             | Binary      | 6,293 | 263 (4.2)    | -              | -            |
|                                                                                                                                                                                                                     | Had arthritis                                              | Binary      | 6,293 | 203 (3.2)    | -              | -            |
|                                                                                                                                                                                                                     | Had psoriasis                                              | Binary      | 6,293 | 211 (3.4)    | -              | -            |
|                                                                                                                                                                                                                     | Had alcoholism                                             | Binary      | 6,293 | 49 (0.8)     | -              | -            |
|                                                                                                                                                                                                                     | Had anorexia nervosa                                       | Binary      | 6,293 | 119 (1.9)    | -              | -            |
|                                                                                                                                                                                                                     | Had severe depression                                      | Binary      | 6,293 | 456 (7.3)    | -              | -            |
|                                                                                                                                                                                                                     | Any allergies                                              | Binary      | 6,212 | 2,797 (45.0) | -              | -            |
|                                                                                                                                                                                                                     | Height (cm)                                                | Continuous  | 6,196 | -            | 164.28 (6.67)  | -            |
|                                                                                                                                                                                                                     | Dwelling type                                              | Categorical | 6,308 | -            | -              | 6 (51-2,323) |
|                                                                                                                                                                                                                     | Number of medications during pregnancy                     | Ordinal     | 6,375 | -            | 1.49 (1.44)    | -            |
|                                                                                                                                                                                                                     | Cups of coffee per week                                    | Continuous  | 5,969 | -            | 7.84 (11.18)   | -            |
|                                                                                                                                                                                                                     | Measures of alcohol per week                               | Continuous  | 5,743 | -            | 1.62 (3.73)    | -            |
|                                                                                                                                                                                                                     | Partner smokes                                             | Binary      | 6,243 | 1,951 (31.3) | -              | -            |
|                                                                                                                                                                                                                     | Self-induced vomiting during pregnancy                     | Binary      | 5,980 | 60 (1.1)     | -              | -            |
|                                                                                                                                                                                                                     | Alcohol use in second trimester of pregnancy               | Binary      | 6,138 | 1,165 (19.0) | -              | -            |
|                                                                                                                                                                                                                     | Mother had influenza during pregnancy                      | Binary      | 4,493 | 785 (17.5)   | -              | -            |
|                                                                                                                                                                                                                     | Mother had shock or freight during pregnancy               | Binary      | 4,499 | 578 (12.9)   | -              | -            |
|                                                                                                                                                                                                                     | Mother smoked during last 2 months of pregnancy            | Binary      | 4,759 | 621 (13.1)   | -              | -            |
|                                                                                                                                                                                                                     | Mother used cannabis during pregnancy                      | Binary      | 4,594 | 93 (2.0)     | -              | -            |
|                                                                                                                                                                                                                     | Maximum postnatal depression score during pregnancy (EPND) | Continuous  | 4,756 | -            | 7.54 (4.62)    | -            |
| Mother questionnaires and clinics after pregnancy                                                                                                                                                                   | Mothers postnatal weight (lb.)                             | Continuous  | 5,173 | -            | 143.77 (23.18) | -            |
| <a href="http://www.bristol.ac.uk/alspac/researchers/resources-">http://www.bristol.ac.uk/alspac/researchers/resources-</a>                                                                                         | Mother had alcohol problem since child age 5               | Binary      | 5,541 | 65 (1.2)     | -              | -            |
|                                                                                                                                                                                                                     | Mother had cancer since child age 5                        | Binary      | 5,498 | 40 (0.7)     | -              | -            |
|                                                                                                                                                                                                                     | Used cannabis since child age 5                            | Binary      | 5,535 | 238 (4.3)    | -              | -            |

|                                                                                                                                                                                                                                                                                                                                                                                                    |                                                    |            |              |              |               |   |
|----------------------------------------------------------------------------------------------------------------------------------------------------------------------------------------------------------------------------------------------------------------------------------------------------------------------------------------------------------------------------------------------------|----------------------------------------------------|------------|--------------|--------------|---------------|---|
| <a href="#">available/data-<br/>details/questionnaires/#carer</a>                                                                                                                                                                                                                                                                                                                                  | Amphetamine use since child age 5                  | Binary     | 5,520        | 42 (0.8)     | -             | - |
|                                                                                                                                                                                                                                                                                                                                                                                                    | Number of cigarettes partner smokes per day        | Continuous | 5,064        | -            | 3.16 (7.21)   | - |
|                                                                                                                                                                                                                                                                                                                                                                                                    | Partners alcohol consumption                       | Binary     | 5,165        | 1,810 (35.0) | -             | - |
| Child based questionnaires completed by the Mother when the child was around 7 years of age<br><br><a href="http://www.bristol.ac.uk/alspac/researchers/resources-available/data-details/questionnaires/document/questionnaire-topic-guide-dec11.pdf">http://www.bristol.ac.uk/alspac/researchers/resources-available/data-details/questionnaires/document/questionnaire-topic-guide-dec11.pdf</a> | Parenting score                                    | Continuous | 5,749        | -            | 48.19 (7..44) | - |
|                                                                                                                                                                                                                                                                                                                                                                                                    | Child had diarrhea in past 12 months               | Binary     | 5,931        | 1,971 (33.7) | -             | - |
|                                                                                                                                                                                                                                                                                                                                                                                                    | Child had blood in stools in the past 12 months    | Binary     | 5,512        | 36 (0.7)     | -             | - |
|                                                                                                                                                                                                                                                                                                                                                                                                    | Child had vomiting in the past 12 months           | Binary     | 5,558        | 2,401 (43.2) | -             | - |
|                                                                                                                                                                                                                                                                                                                                                                                                    | Child had a cough in the past 12 months            | Binary     | 5,590        | 4,239 (75.8) | -             | - |
|                                                                                                                                                                                                                                                                                                                                                                                                    | Child had a high temperature in the past 12 months | Binary     | 5,576        | 2,890 (51.8) | -             | - |
|                                                                                                                                                                                                                                                                                                                                                                                                    | Child had a rash in past 12 months                 | Binary     | 5,718        | 991 (17.3)   | -             | - |
|                                                                                                                                                                                                                                                                                                                                                                                                    | Child had wheezing in the past 12 months           | Binary     | 5,728        | 605 (10.6)   | -             | - |
|                                                                                                                                                                                                                                                                                                                                                                                                    | Child had breathlessness in past 12 months         | Binary     | 5,723        | 323 (5.6)    | -             | - |
|                                                                                                                                                                                                                                                                                                                                                                                                    | Child had urinary infection in past 12 months      | Binary     | 5,709        | 166 (2.9)    | -             | - |
|                                                                                                                                                                                                                                                                                                                                                                                                    | Child had headaches in past 12 months              | Binary     | 5,723        | 2,673 (46.7) | -             | - |
|                                                                                                                                                                                                                                                                                                                                                                                                    | Child had constipation in past 12 months           | Binary     | 5,720        | 561 (9.8)    | -             | - |
|                                                                                                                                                                                                                                                                                                                                                                                                    | Child had eczema in past 12 months                 | Binary     | 5,720        | 941 (16.5)   | -             | - |
|                                                                                                                                                                                                                                                                                                                                                                                                    | Child had hay fever in past 12 months              | Binary     | 5,704        | 496 (8.7)    | -             | - |
|                                                                                                                                                                                                                                                                                                                                                                                                    | Doctor has ever said child has asthma              | Binary     | 5,677        | 1,132 (19.9) | -             | - |
|                                                                                                                                                                                                                                                                                                                                                                                                    | Child had an eye infection in past 12 months       | Binary     | 5,721        | 183 (3.2)    | -             | - |
|                                                                                                                                                                                                                                                                                                                                                                                                    | Child had an ear infection in past 12 months       | Binary     | 5,719        | 792 (13.9)   | -             | - |
|                                                                                                                                                                                                                                                                                                                                                                                                    | Child had a chest infection in past 12 months      | Binary     | 5,712        | 339 (5.9)    | -             | - |
|                                                                                                                                                                                                                                                                                                                                                                                                    | Child had tonsillitis/laryngitis in past 12 months | Binary     | 5,722        | 403 (7.0)    | -             | - |
|                                                                                                                                                                                                                                                                                                                                                                                                    | Child had scarlet fever in past 12 months          | Binary     | 5,717        | 21 (0.4)     | -             | - |
|                                                                                                                                                                                                                                                                                                                                                                                                    | Child had influenza in past 12 months              | Binary     | 5,696        | 303 (5.3)    | -             | - |
|                                                                                                                                                                                                                                                                                                                                                                                                    | Any compulsions                                    | Binary     | 5,652        | 510 (9.0)    | -             | - |
|                                                                                                                                                                                                                                                                                                                                                                                                    | Any general anxieties                              | Binary     | 5,704        | 2,877 (50.4) | -             | - |
|                                                                                                                                                                                                                                                                                                                                                                                                    | Any attention symptoms                             | Binary     | 5,693        | 2,922 (51.3) | -             | - |
|                                                                                                                                                                                                                                                                                                                                                                                                    | Any awkward behaviors                              | Binary     | 5,691        | 1,968 (34.6) | -             | - |
|                                                                                                                                                                                                                                                                                                                                                                                                    | Any troublesome behaviors                          | Binary     | 5,714        | 1,856 (32.5) | -             | - |
|                                                                                                                                                                                                                                                                                                                                                                                                    | Any educational problems                           | Binary     | 5,618        | 741 (13.2)   | -             | - |
|                                                                                                                                                                                                                                                                                                                                                                                                    | Clinical diagnosis of ADHD                         | Binary     | 5,727        | 114 (2.0)    | -             | - |
|                                                                                                                                                                                                                                                                                                                                                                                                    | Clinical diagnosis of conduct disorder             | Binary     | 5,727        | 181 (3.2)    | -             | - |
|                                                                                                                                                                                                                                                                                                                                                                                                    | Clinical diagnosis of anxiety disorder             | Binary     | 5,747        | 165 (2.9)    | -             | - |
|                                                                                                                                                                                                                                                                                                                                                                                                    | Clinical diagnosis of depressive disorder          | Binary     | 5,747        | 24 (0.4)     | -             | - |
|                                                                                                                                                                                                                                                                                                                                                                                                    | Child had an accident in the past year             | Binary     | 5,799        | 669 (11.5)   | -             | - |
|                                                                                                                                                                                                                                                                                                                                                                                                    | Child had tonsils removed                          | Binary     | 5,799        | 194 (3.4)    | -             | - |
| Child had teeth extracted                                                                                                                                                                                                                                                                                                                                                                          | Binary                                             | 5,799      | 521 (9.0)    | -            | -             |   |
| Child snored in past year                                                                                                                                                                                                                                                                                                                                                                          | Binary                                             | 5,454      | 3,424 (63.3) | -            | -             |   |
| Conduct problems score                                                                                                                                                                                                                                                                                                                                                                             | Ordinal                                            | 5,615      | -            | 1.56 (1.42)  | -             |   |
| Child moved home since 5 <sup>th</sup> birthday                                                                                                                                                                                                                                                                                                                                                    | Binary                                             | 5,772      | 922 (16.0)   | -            | -             |   |
| Fine motor score                                                                                                                                                                                                                                                                                                                                                                                   | Continuous                                         | 5,762      | -            | 1.98 (0.09)  | -             |   |

|                             |             |       |              |              |               |
|-----------------------------|-------------|-------|--------------|--------------|---------------|
| Cognitive score             | Continuous  | 5,775 | -            | 1.96 (0.11)  | -             |
| Communication score         | Continuous  | 5,772 | -            | 1.96 (0.13)  | -             |
| Child activity score        | Continuous  | 5,799 | -            | 17.68 (4.92) | -             |
| Child has tried alcohol     | Binary      | 5,401 | 2,498 (46.3) | -            | -             |
| Parity                      | Categorical | 6,494 | -            | -            | 4 (302-2,935) |
| Number of awkward behaviors | Ordinal     | 5,773 | -            | 1.19 (2.16)  | -             |

---

<sup>a</sup> binary variables only

<sup>b</sup> continuous and ordinal variables only

<sup>c</sup> categorical variables, number of categories and range of individuals in each of those categories

**Supplementary Table 2.** Summary of top phenotype-genotype associations

| SNP                                                  | Chr | Gene/closest gene | Trait <sup>1</sup>           | Phenotype <sup>1</sup> | p-value                 | Effect size (95% CI)                          | MAF   |
|------------------------------------------------------|-----|-------------------|------------------------------|------------------------|-------------------------|-----------------------------------------------|-------|
| <b>Associations from pruned dataset</b>              |     |                   |                              |                        |                         |                                               |       |
| rs9568856                                            | 13  | <i>OLFM4</i>      | Obesity                      | Hip circumference      | 3.698x10 <sup>-8</sup>  | coef (cm) = 0.79 (0.51, 1.08)                 | 0.129 |
| rs4820268                                            | 22  | <i>TMPRSS6</i>    | Variety of hematology traits | Hemoglobin levels      | 3.705x10 <sup>-8</sup>  | coef (grams per liter) = -0.89 (-1.20, -0.57) | 0.482 |
| rs9568856                                            | 13  | <i>OLFM4</i>      | Obesity                      | Arm circumference      | 4.662x10 <sup>-8</sup>  | coef (cm) = 0.31 (0.20, 0.42)                 | 0.129 |
| <b>Additional associations from unpruned dataset</b> |     |                   |                              |                        |                         |                                               |       |
| rs855791                                             | 22  | <i>TMPRSS6</i>    | Variety of hematology traits | Hemoglobin levels      | 8.241x10 <sup>-12</sup> | coef (grams per liter) = -1.10 (-1.42, -0.79) | 0.458 |
| rs9568867                                            | 13  | <i>OLFM4</i>      | BMI/Obesity                  | Arm circumference      | 2.191x10 <sup>-10</sup> | coef (cm) = 0.37 (0.26, 0.48)                 | 0.125 |
| rs9568867                                            | 13  | <i>OLFM4</i>      | BMI/Obesity                  | BMI                    | 9.890x10 <sup>-9</sup>  | coef (kg/m <sup>2</sup> ) = 0.32 (0.21, 0.43) | 0.125 |
| rs9568867                                            | 13  | <i>OLFM4</i>      | BMI/Obesity                  | Hip circumference      | 1.059x10 <sup>-8</sup>  | coef (cm) = 0.84 (0.55, 1.12)                 | 0.125 |
| rs2413450                                            | 22  | <i>TMPRSS6</i>    | Variety of hematology traits | Hemoglobin levels      | 2.899x10 <sup>-8</sup>  | coef (grams per liter) = -0.89 (-1.21, -0.58) | 0.482 |
| rs2290400                                            | 17  | <i>GSDMB</i>      | Type I diabetes              | Asthma                 | 4.511x10 <sup>-8</sup>  | OR (of having asthma) = 1.30 (1.18, 1.42)     | 0.483 |

<sup>1</sup> Trait relates to the broad phenotype reported in the NHGRI-EBI GWAS catalog; phenotype relates to the phenotype examined in the study reported in this manuscript

**Supplementary Table 3.** Summary of phenotypic and genotypic pairwise associations observed between 121 phenotypes and genotypes (pruned set, genome-wide significant SNPs only).

| Number of SNPs | Associations | Cut off <i>P</i> value | Observed N (%) | Expected N (%) | $\chi^2$ (d.f, <i>P</i> value)    | O:E ratio ((95% CI), <i>P</i> value) |
|----------------|--------------|------------------------|----------------|----------------|-----------------------------------|--------------------------------------|
|                |              | 0.05                   | 16,967 (5.1)   | 16,692 (5.0)   | 4.77 (1, 0.029)                   | 1.02 ((1.00,1.04), 0.124)            |
| 2,759          | 333,839      | 0.01                   | 3,661 (1.1)    | 3,338 (1.0)    | 31.57 (1, 1.92x10 <sup>-8</sup> ) | 1.10 ((1.05,1.15), 0.0001)           |
|                |              | 0.0001                 | 66 (0.02)      | 33 (0.01)      | 33.00 (1, 9.2x10 <sup>-9</sup> )  | 2.00 ((1.32,3.04), 0.0011)           |

**Supplementary Table 4.** Number of Bonferroni significant genotype-genotype correlations across the different datasets.

| Dataset              | Bonferroni P value    | # Bonferroni significant | # in total | Percentage at Bonferroni P value (%) |
|----------------------|-----------------------|--------------------------|------------|--------------------------------------|
| ALSPAC only          | 1.89x10 <sup>-4</sup> | 8876                     | 46,885,086 | 0.0189                               |
| EUR only             | 3.03x10 <sup>-5</sup> | 1534                     | 50,566,596 | 0.0030                               |
| WTCCC only           | 1.26x10 <sup>-4</sup> | 3042                     | 24,099,153 | 0.0126                               |
| ALSPAC & EUR         | 2.56x10 <sup>-5</sup> | 1090                     | 42,573,378 | 0.0026                               |
| ALSPAC & WTCCC       | 1.17x10 <sup>-4</sup> | 2397                     | 20,419,245 | 0.0117                               |
| EUR & WTCCC          | 3.09x10 <sup>-4</sup> | 624                      | 20,177,128 | 0.0031                               |
| ALSPAC & EUR & WTCCC | 1.41x10 <sup>-5</sup> | 569                      | 19,012,861 | 0.0030                               |

ALSPAC is the ALSPAC sample results, EUR is the 1000 Genomes European populations and WTCCC is the Wellcome Trust Case Control Consortium.

\* The percentage of overlapping genotype-genotype correlations that were Bonferroni significant in each individual dataset from the total of overlapping genotype-genotype correlations between the three datasets.

**Supplementary Table 5.** Summary of analysis within and between 177 phenotypes (including biomedical and serological phenotypes\*) and genotypes (unpruned and pruned for LD)

| Number of SNPs                                       | Associations | Cut off P value | Observed N (%) | Expected N (%) | $\chi^2$ (d.f, P value)                  | O:E ratio ((95% CI), P value)                          |
|------------------------------------------------------|--------------|-----------------|----------------|----------------|------------------------------------------|--------------------------------------------------------|
| <b>WITHIN PHENOTYPES</b>                             |              |                 |                |                |                                          |                                                        |
| N/A                                                  | 15,576       | 0.05            | 4,818 (30.93)  | 779 (5.0)      | 22044.11 (1, $\leq 1 \times 10^{-50}$ )  | 6.18 ((5.75, 6.65), $\leq 1 \times 10^{-50}$ )         |
|                                                      |              | 0.01            | 3,557 (22.77)  | 156 (1.0)      | 74869.28 (1, $\leq 1 \times 10^{-50}$ )  | 22.80 ((19.45, 26.72), $\leq 1 \times 10^{-50}$ )      |
|                                                      |              | 0.0001          | 2,270 (14.57)  | 2 (0.01)       | 2572242.3 (1, $\leq 1 \times 10^{-50}$ ) | 1135.00 ((283.74, 4540.19), $\leq 1 \times 10^{-50}$ ) |
| <b>BETWEEN ALL CATALOG SNPS AND PHENOTYPES</b>       |              |                 |                |                |                                          |                                                        |
| 13,720                                               | 2,428,440    | 0.05            | 131,972 (5.43) | 121,442 (5.0)  | 961.10 (1, $\leq 1 \times 10^{-50}$ )    | 1.09 ((1.08, 1.09), $\leq 1 \times 10^{-50}$ )         |
|                                                      |              | 0.01            | 29,685 (1.22)  | 24,284 (1.0)   | 1213.37 (1, $\leq 1 \times 10^{-50}$ )   | 1.22 ((1.20, 1.24), $\leq 1 \times 10^{-50}$ )         |
|                                                      |              | 0.0001          | 1,486 (0.06)   | 243 (0.01)     | 6358.86 (1, $\leq 1 \times 10^{-50}$ )   | 6.12 ((5.34, 7.00), $\leq 1 \times 10^{-50}$ )         |
| <b>BETWEEN LD PRUNED CATALOG SNPS AND PHENOTYPES</b> |              |                 |                |                |                                          |                                                        |
| 9,684                                                | 1,714,068    | 0.05            | 89,912 (5.25)  | 85,703 (5.0)   | 217.59 (1, $3.04 \times 10^{-49}$ )      | 1.05 ((1.04, 1.06), $\leq 1 \times 10^{-50}$ )         |
|                                                      |              | 0.01            | 18,941 (1.11)  | 17,141 (1.0)   | 190.93 (1, $1.99 \times 10^{-43}$ )      | 1.11 ((1.08, 1.13), $\leq 1 \times 10^{-50}$ )         |
|                                                      |              | 0.0001          | 373 (0.02)     | 171 (0.01)     | 238.64 (1, $\leq 1 \times 10^{-50}$ )    | 2.18 ((1.82, 2.61), $\leq 1 \times 10^{-50}$ )         |

\*177 phenotypes include the 121 used in primary analysis enriched for 56 biomedical and serological phenotypes used in the UK10K consortium



**Supplementary Table 6.** Summary of analysis within and between 56 biomedical and serological phenotypes used in the uk10k consortium and genotypes (unpruned and pruned for LD)

| Number of SNPs                                       | Associations | Cut off <i>P</i> value | Observed N (%) | Expected N (%) | $\chi^2$ (d.f, <i>P</i> value)           | O:E ratio ((95% CI), <i>P</i> value)                 |
|------------------------------------------------------|--------------|------------------------|----------------|----------------|------------------------------------------|------------------------------------------------------|
| <b>WITHIN PHENOTYPES</b>                             |              |                        |                |                |                                          |                                                      |
| N/A                                                  | 1,540        | 0.05                   | 905 (58.77)    | 77 (5.0)       | 9372.30 (1, $\leq 1 \times 10^{-50}$ )   | 11.75 ((9.42, 14.67), $\leq 1 \times 10^{-50}$ )     |
|                                                      |              | 0.01                   | 804 (52.21)    | 15 (1.0)       | 41909.61 (1, $\leq 1 \times 10^{-50}$ )  | 53.60 ((32.32, 88.89), $\leq 1 \times 10^{-50}$ )    |
|                                                      |              | 0.0001                 | 664 (43.12)    | 1 (0.0001)     | 439854.62 (1, $\leq 1 \times 10^{-50}$ ) | 664.00 ((93.51, 4714.74), $\leq 1 \times 10^{-50}$ ) |
| <b>BETWEEN ALL CATALOG SNPS AND PHENOTYPES</b>       |              |                        |                |                |                                          |                                                      |
| 13,720                                               | 768,320      | 0.05                   | 45,224 (5.88)  | 38,416 (5.0)   | 1270.00 (1, $\leq 1 \times 10^{-50}$ )   | 1.17 ((1.16, 1.19), $\leq 1 \times 10^{-50}$ )       |
|                                                      |              | 0.01                   | 11,388 (1.48)  | 7,683 (1.0)    | 3639.50 (1, $\leq 1 \times 10^{-50}$ )   | 1.48 ((1.44, 1.53), $\leq 1 \times 10^{-50}$ )       |
|                                                      |              | 0.0001                 | 1,120 (0.15)   | 77 (0.01)      | 14129.33 (1, $\leq 1 \times 10^{-50}$ )  | 14.55 ((11.55, 18.32), $\leq 1 \times 10^{-50}$ )    |
| <b>BETWEEN LD PRUNED CATALOG SNPS AND PHENOTYPES</b> |              |                        |                |                |                                          |                                                      |
| 9,684                                                | 542,304      | 0.05                   | 29,776 (5.49)  | 27,115 (5.0)   | 274.89 (1, $\leq 1 \times 10^{-50}$ )    | 1.10 ((1.08, 1.12), $\leq 1 \times 10^{-50}$ )       |
|                                                      |              | 0.01                   | 6,603 (1.22)   | 5,423 (1.0)    | 259.32 (1, $\leq 1 \times 10^{-50}$ )    | 1.22 ((1.17, 1.26), $\leq 1 \times 10^{-50}$ )       |
|                                                      |              | 0.0001                 | 189 (0.03)     | 54 (0.01)      | 337.53 (1, $\leq 1 \times 10^{-50}$ )    | 3.50 ((2.59, 4.74), $4.44 \times 10^{-16}$ )         |

\*177 phenotypes include the 121 used in primary analysis enriched for 56 biomedical and serological phenotypes used in the UK10K consortium

**Supplementary Figure 1.** QQ plot of genotypic and phenotypic associations (pruned dataset, genome-wide significant SNPs only).

### Genotype-Phenotype Associations: Genomewide Significant Hits

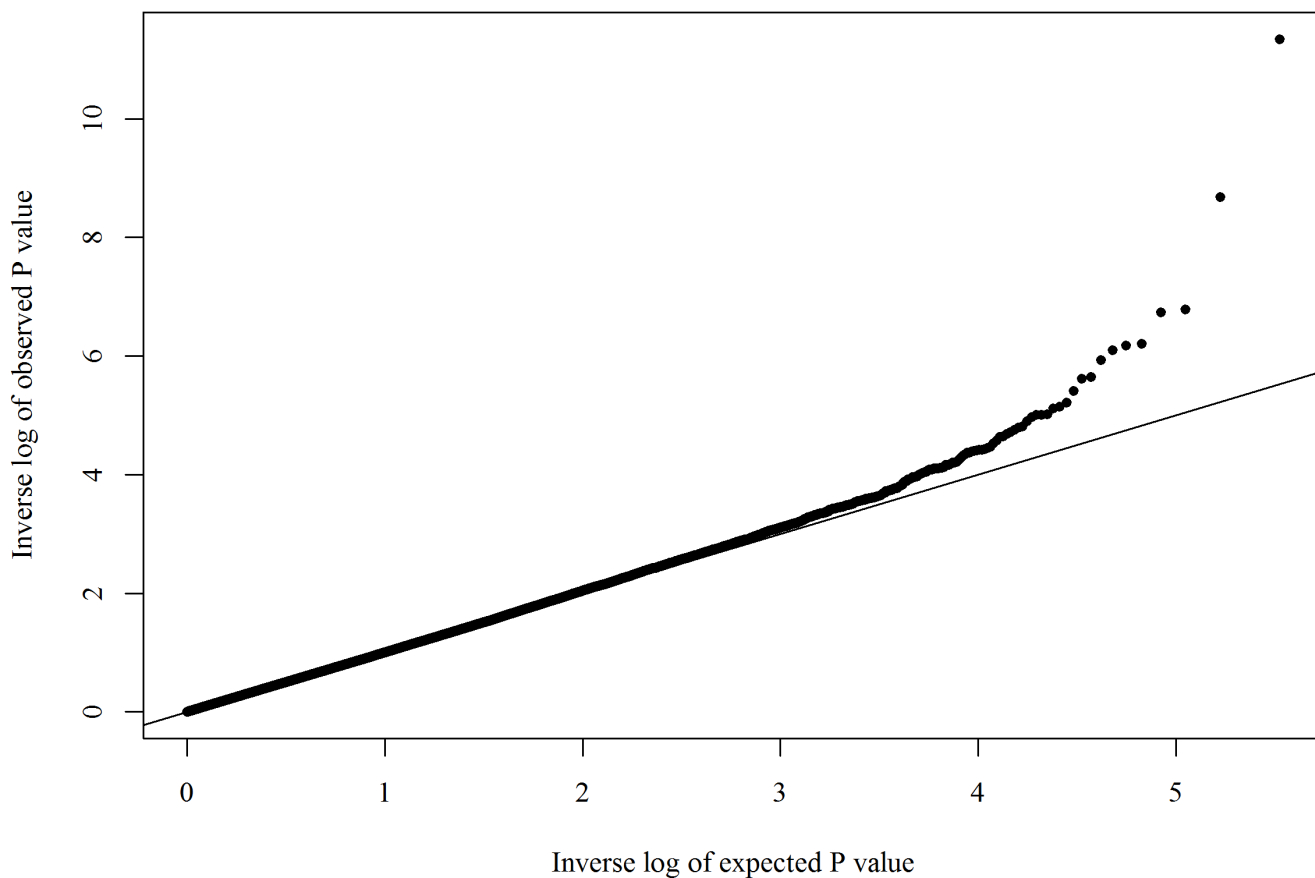

QQ plot of observed associations between 6,175 NHGRI-EBI-GWAS catalog genomewide significant SNPs pruned for LD and 121 phenotypes included in analysis against expected P values. Inverse log of P values is the  $-\log_{10}$  P value.

**Supplementary Figure 2.** Scatterplot of genotype-genotype Pearson's correlations from ALSPAC, WTCCC and 1000genomes European samples.

**Scatterplot of pearson's correlation for Genotype Genotype Correlations**

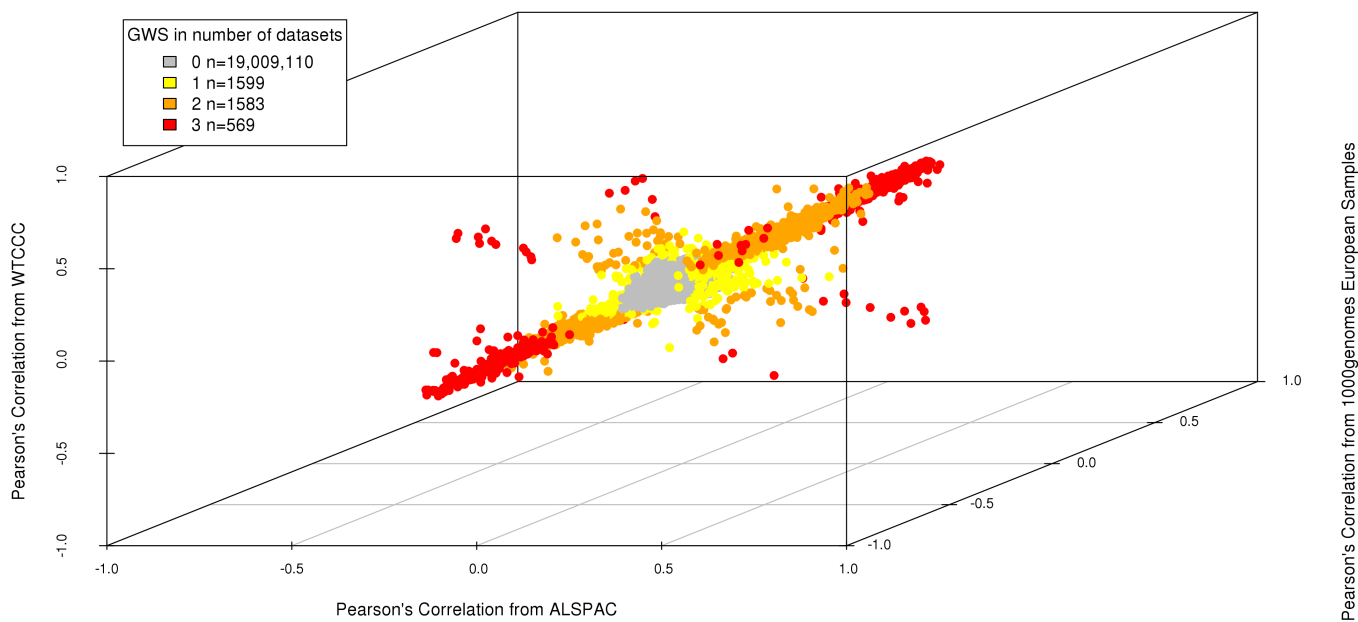

The colors indicate if the Genotype-Genotype correlation was Bonferroni significant in the samples, with grey being not significantly associated in any of the samples, yellow is significantly associated in one sample, orange is significantly associated in two samples and red is significantly associated in all three samples
